# Supplementary material for: RNASequel: accurate and repeat tolerant realignment of RNA-seq reads
Source: PubMed Central journal article supplement — Nucleic Acids Res. 2015 Oct 10;43(18):e122. doi: 10.1093/nar/gkv594 (PMC4605292; doi:10.1093/nar/gkv594), 2015-10-10

Figure S1

**A** chr1: 155105667 – 155110998 bp

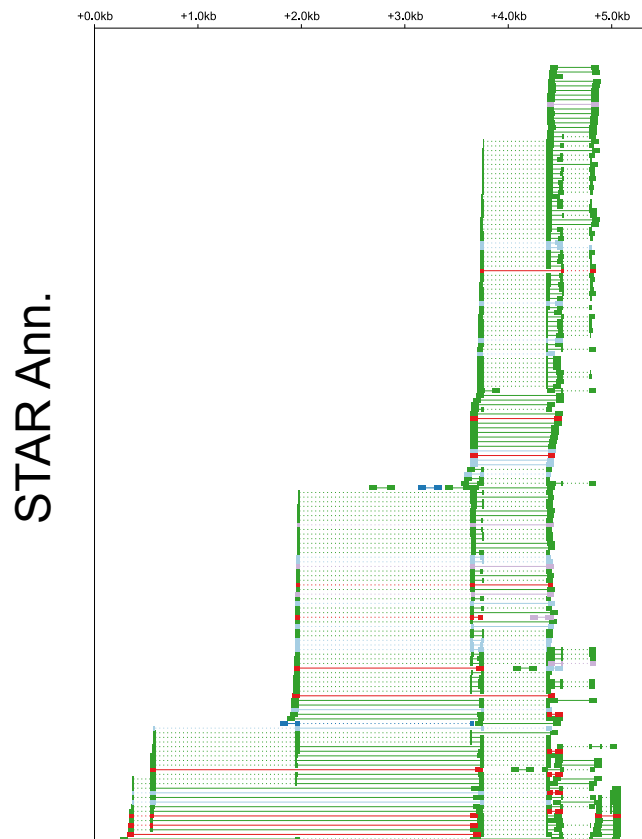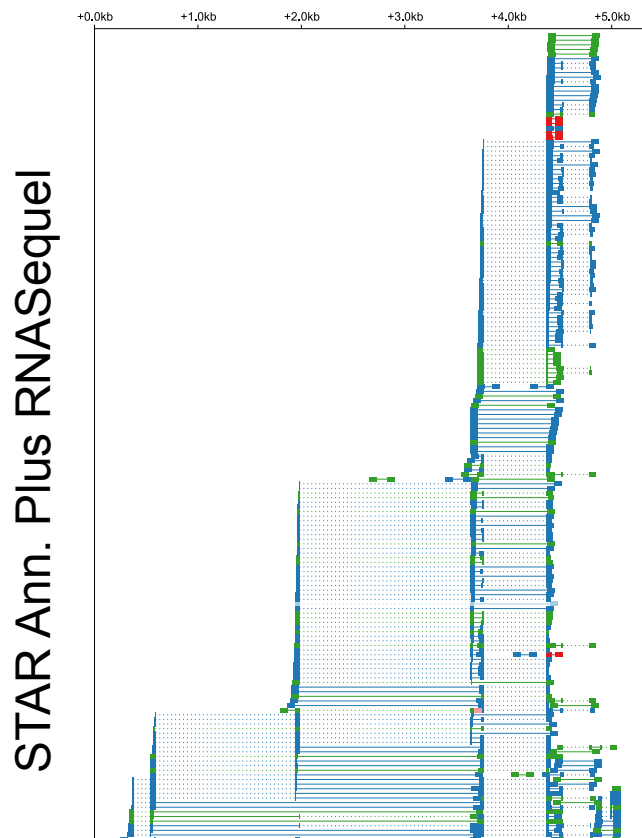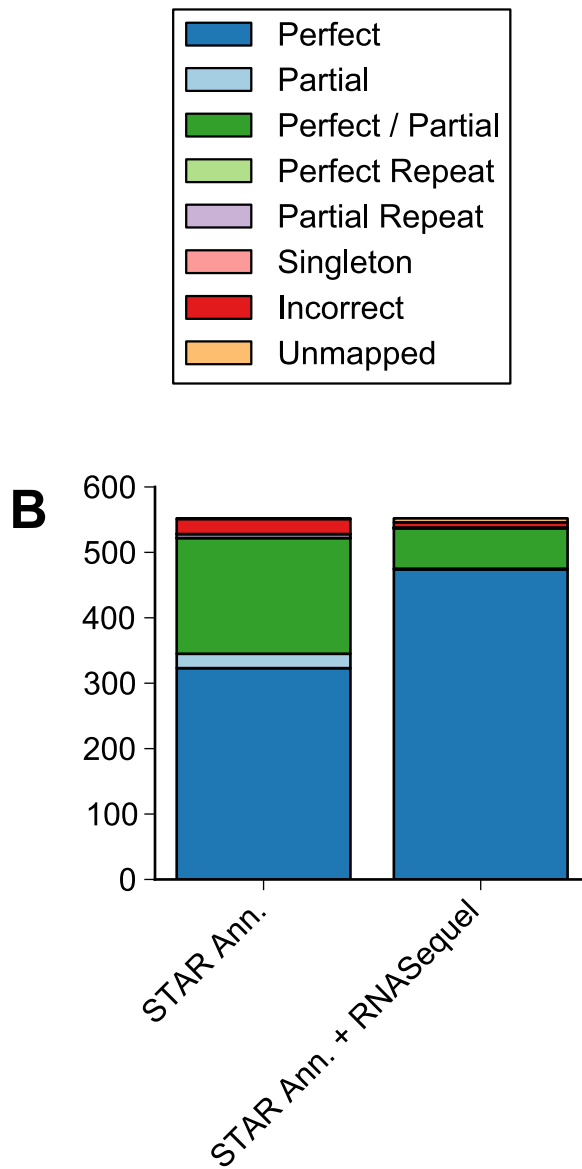

Figure S2

**A** chr2: 238871935 - 238953843 bp

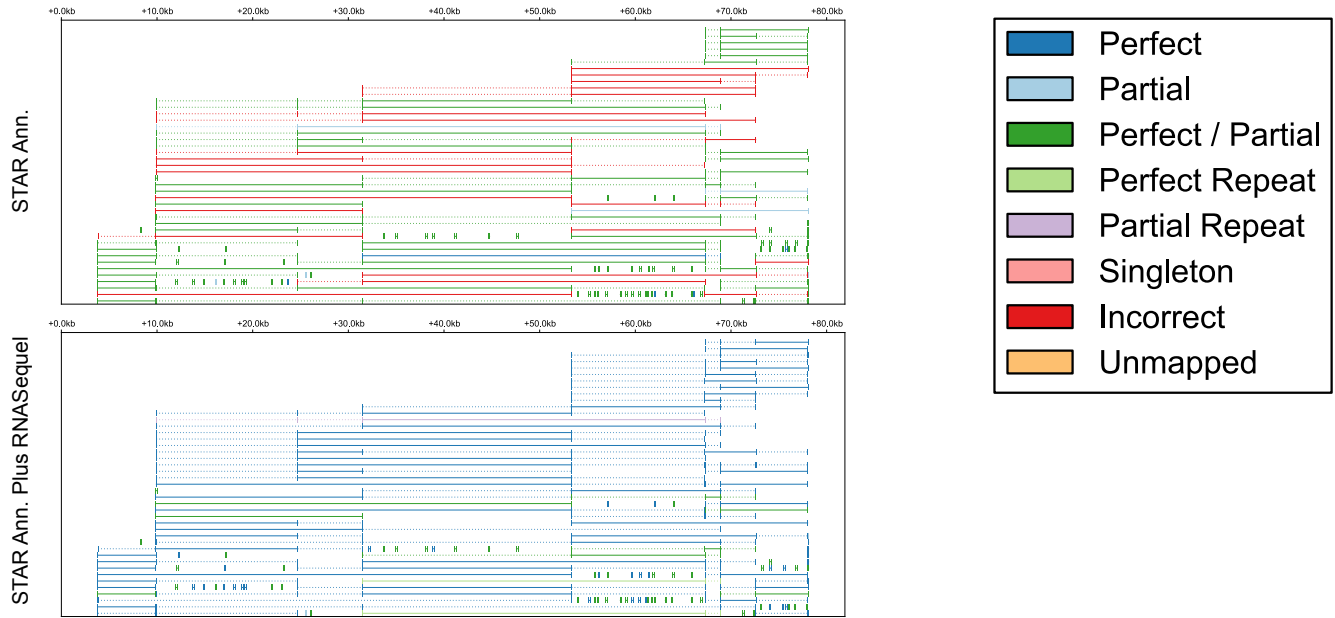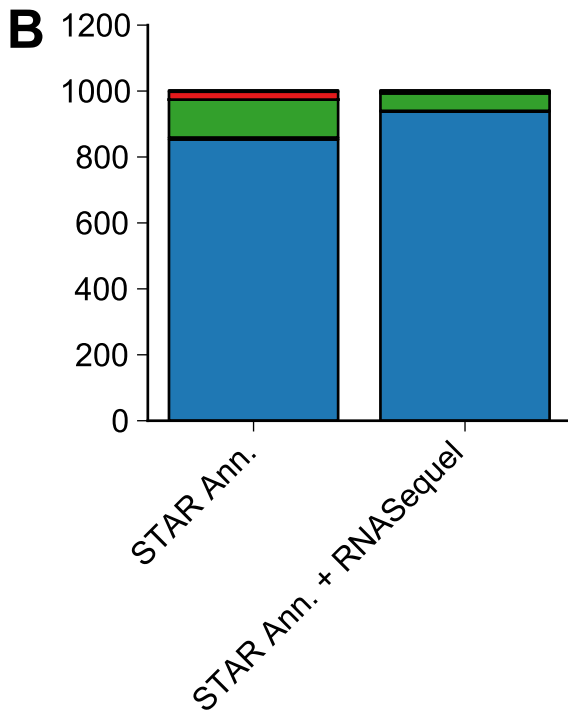

Figure S3

**A** chr8: 145648751 – 145654176 bp

STAR Ann.

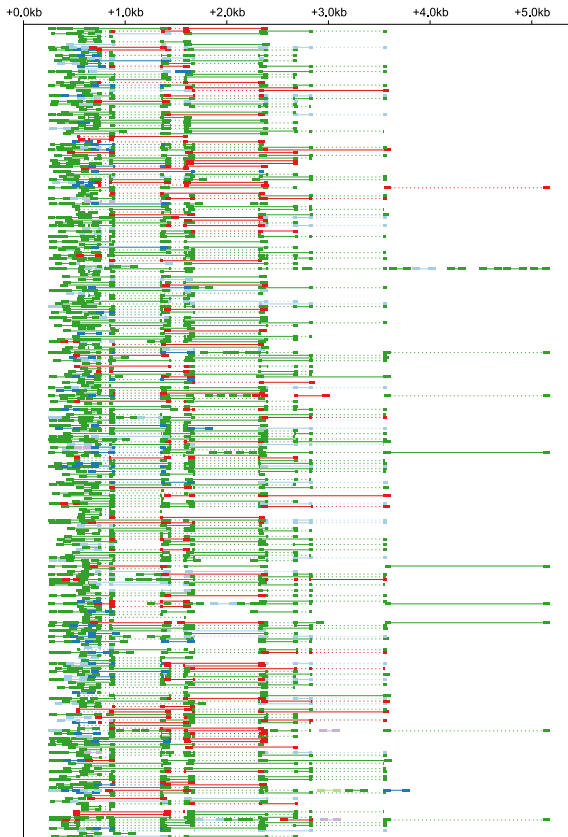

STAR Ann. Plus RNASequel

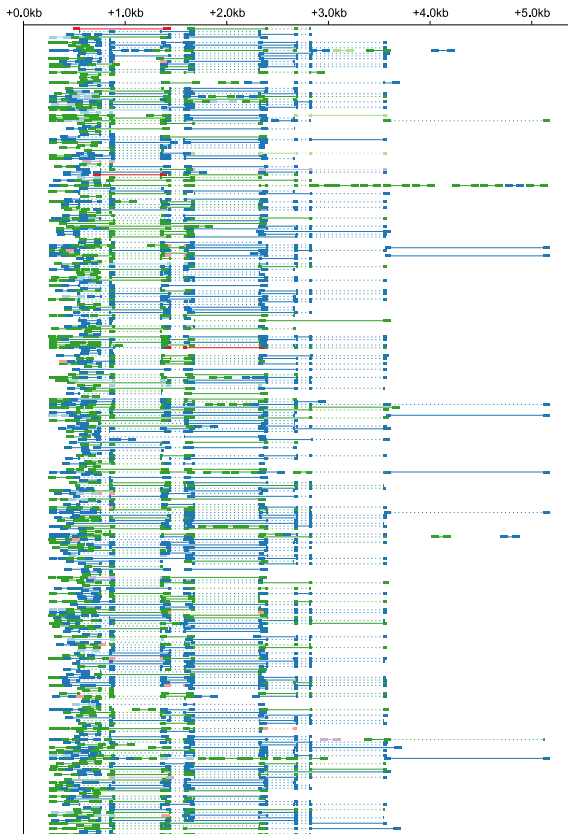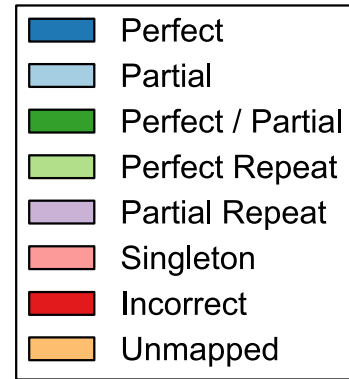

**B**

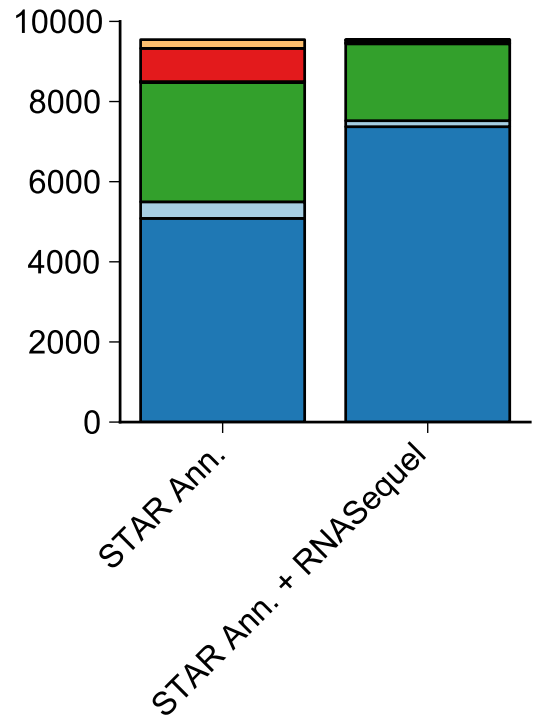

Figure S4

**A** chr20: 61439314 - 61475112 bp

STAR Ann.

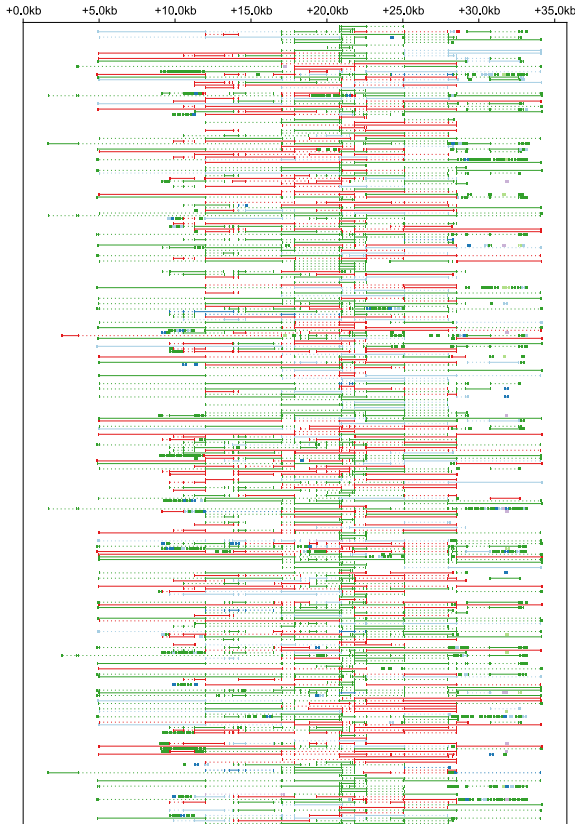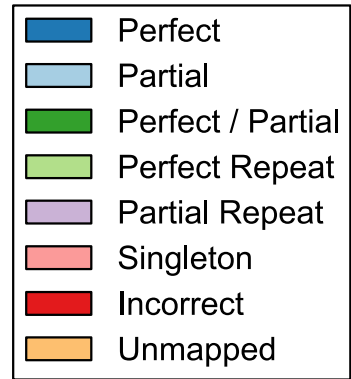

STAR Ann. Plus RNASequel

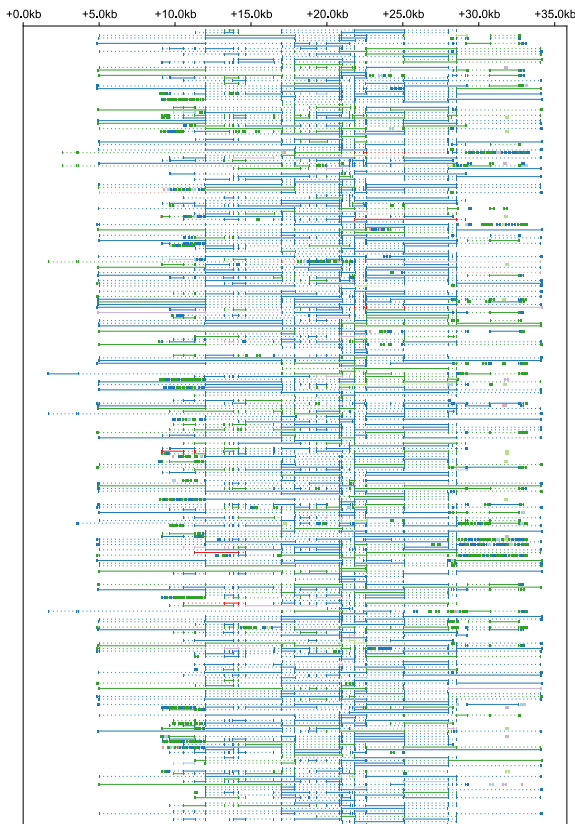

**B**

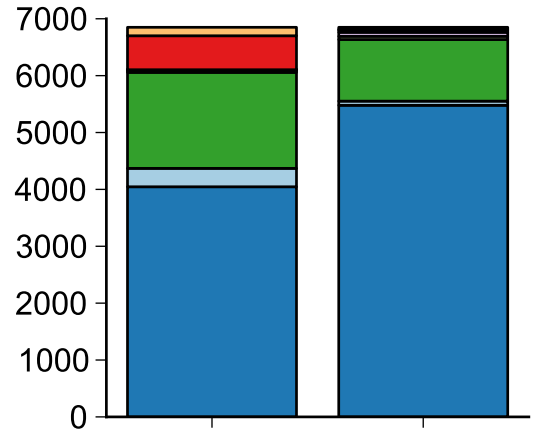

# Figure S5

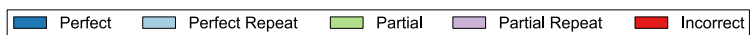

## A

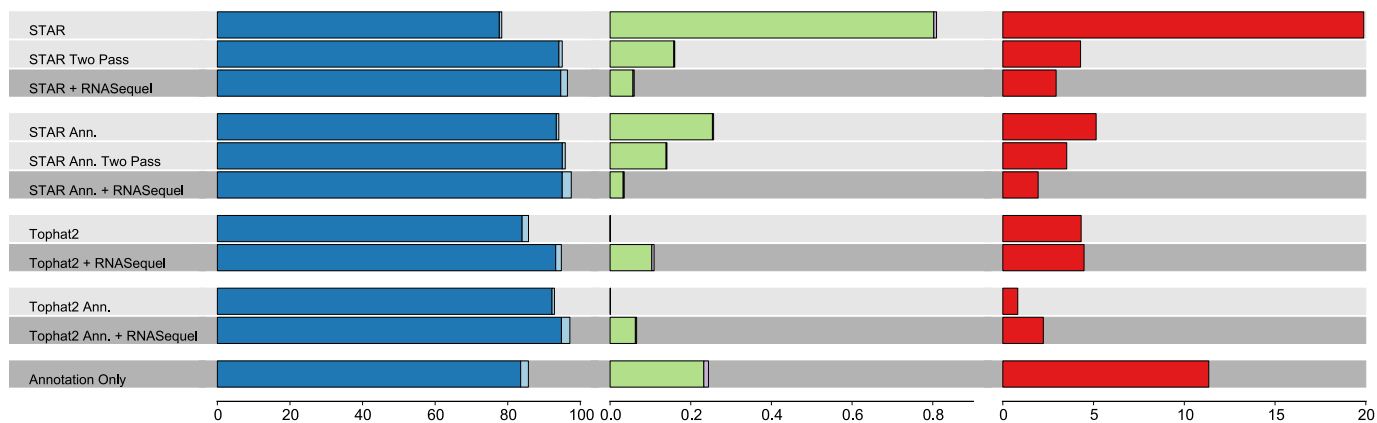

## B

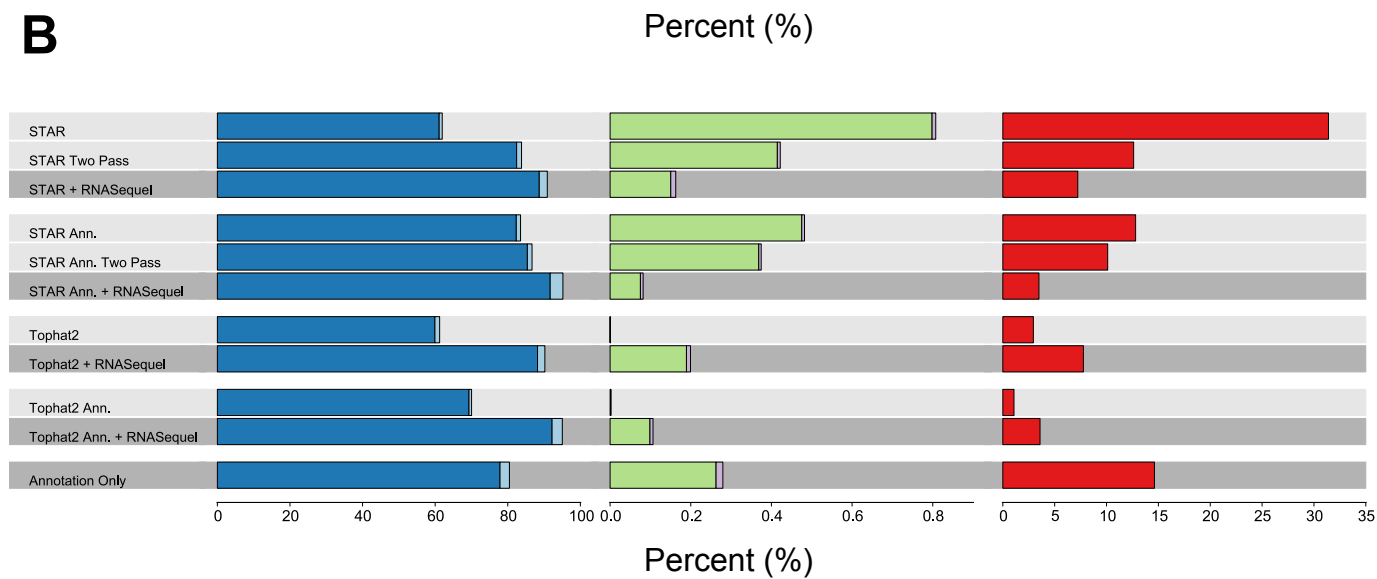

# Figure S6

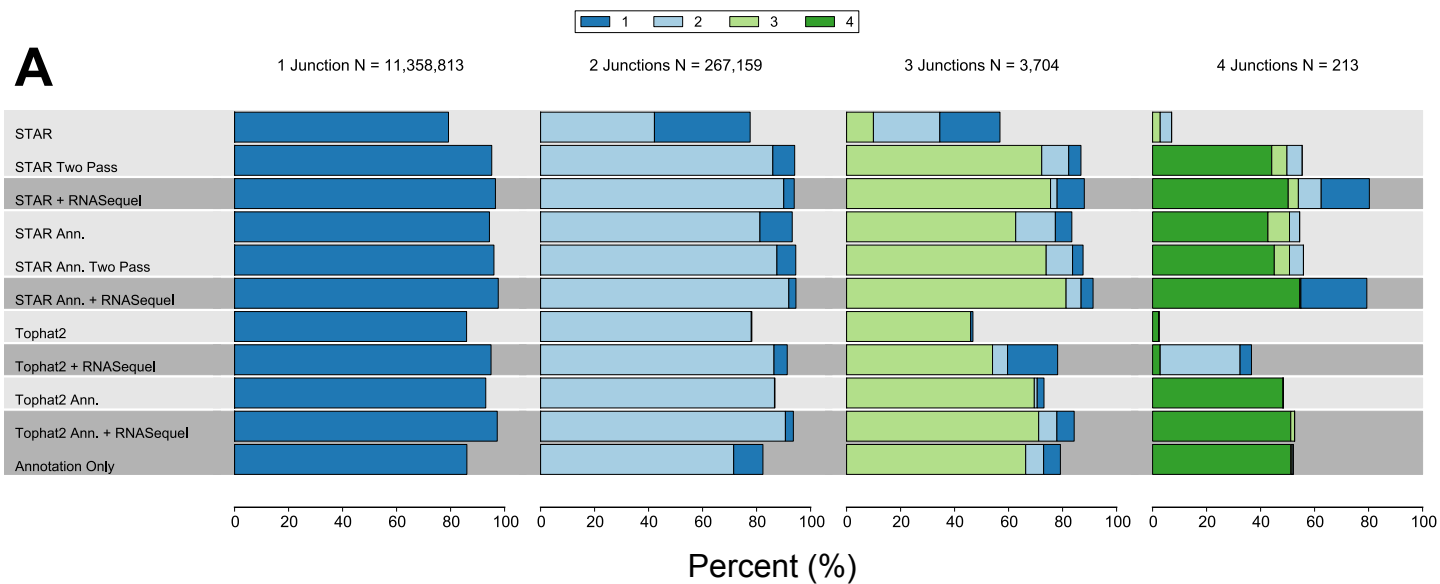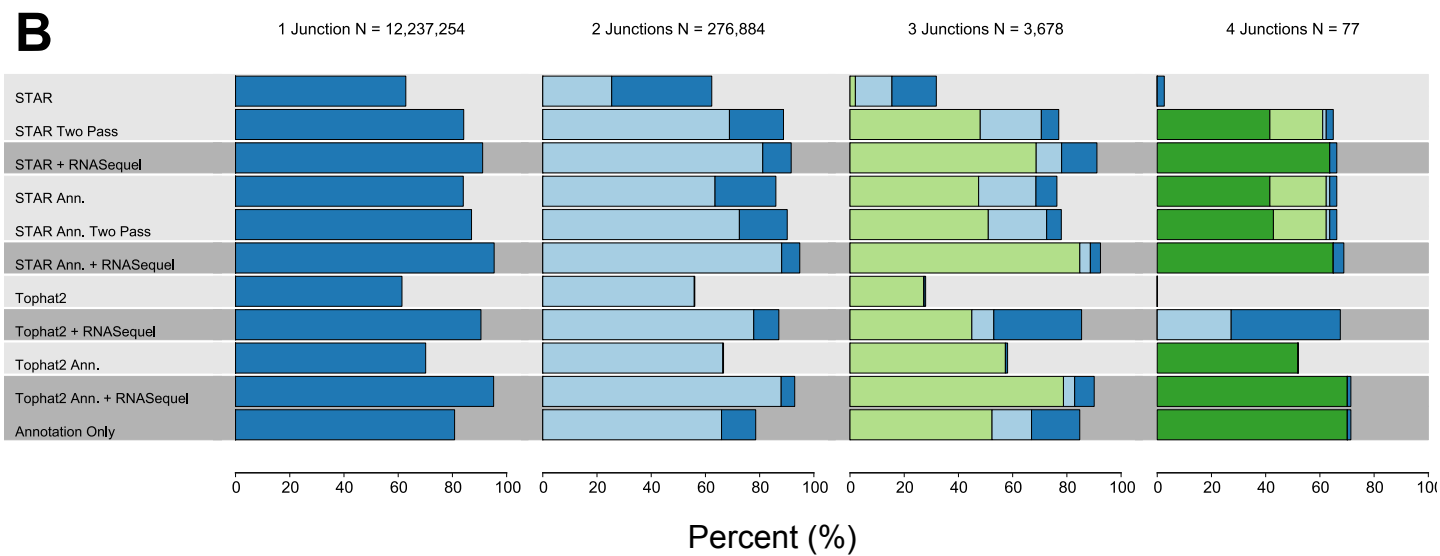

Figure S7

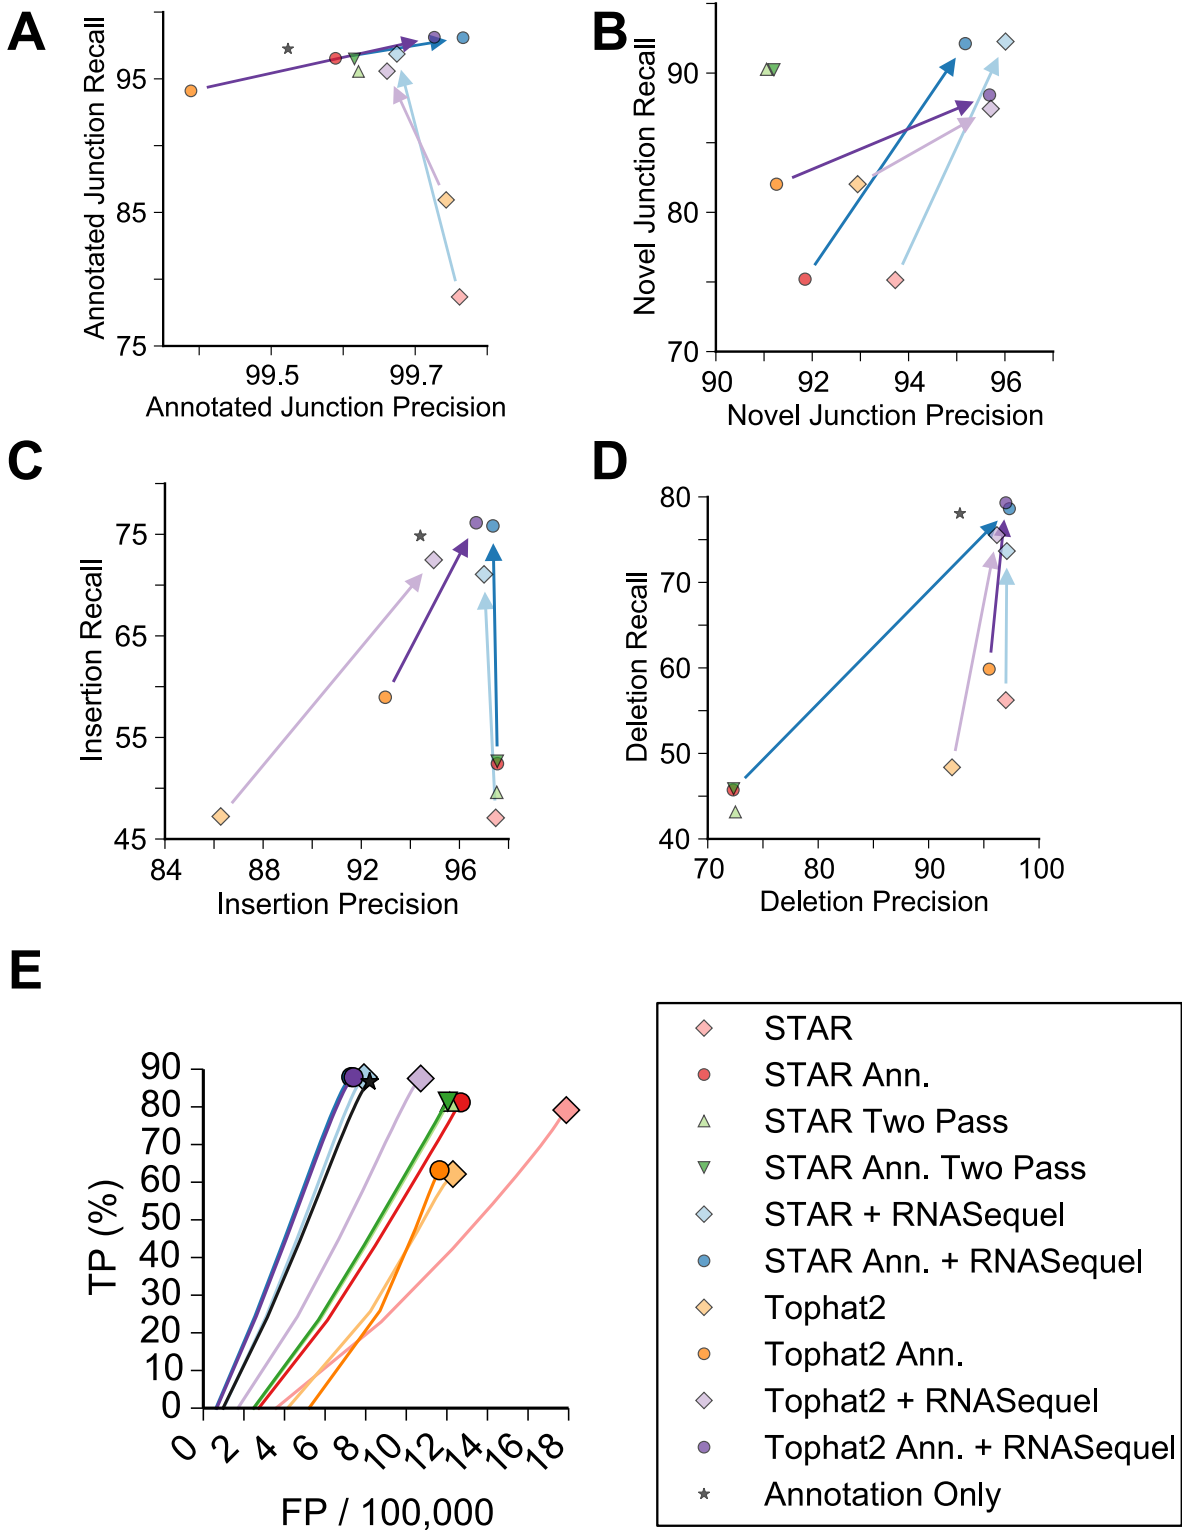

# Figure S8

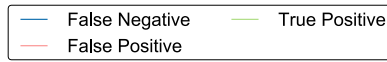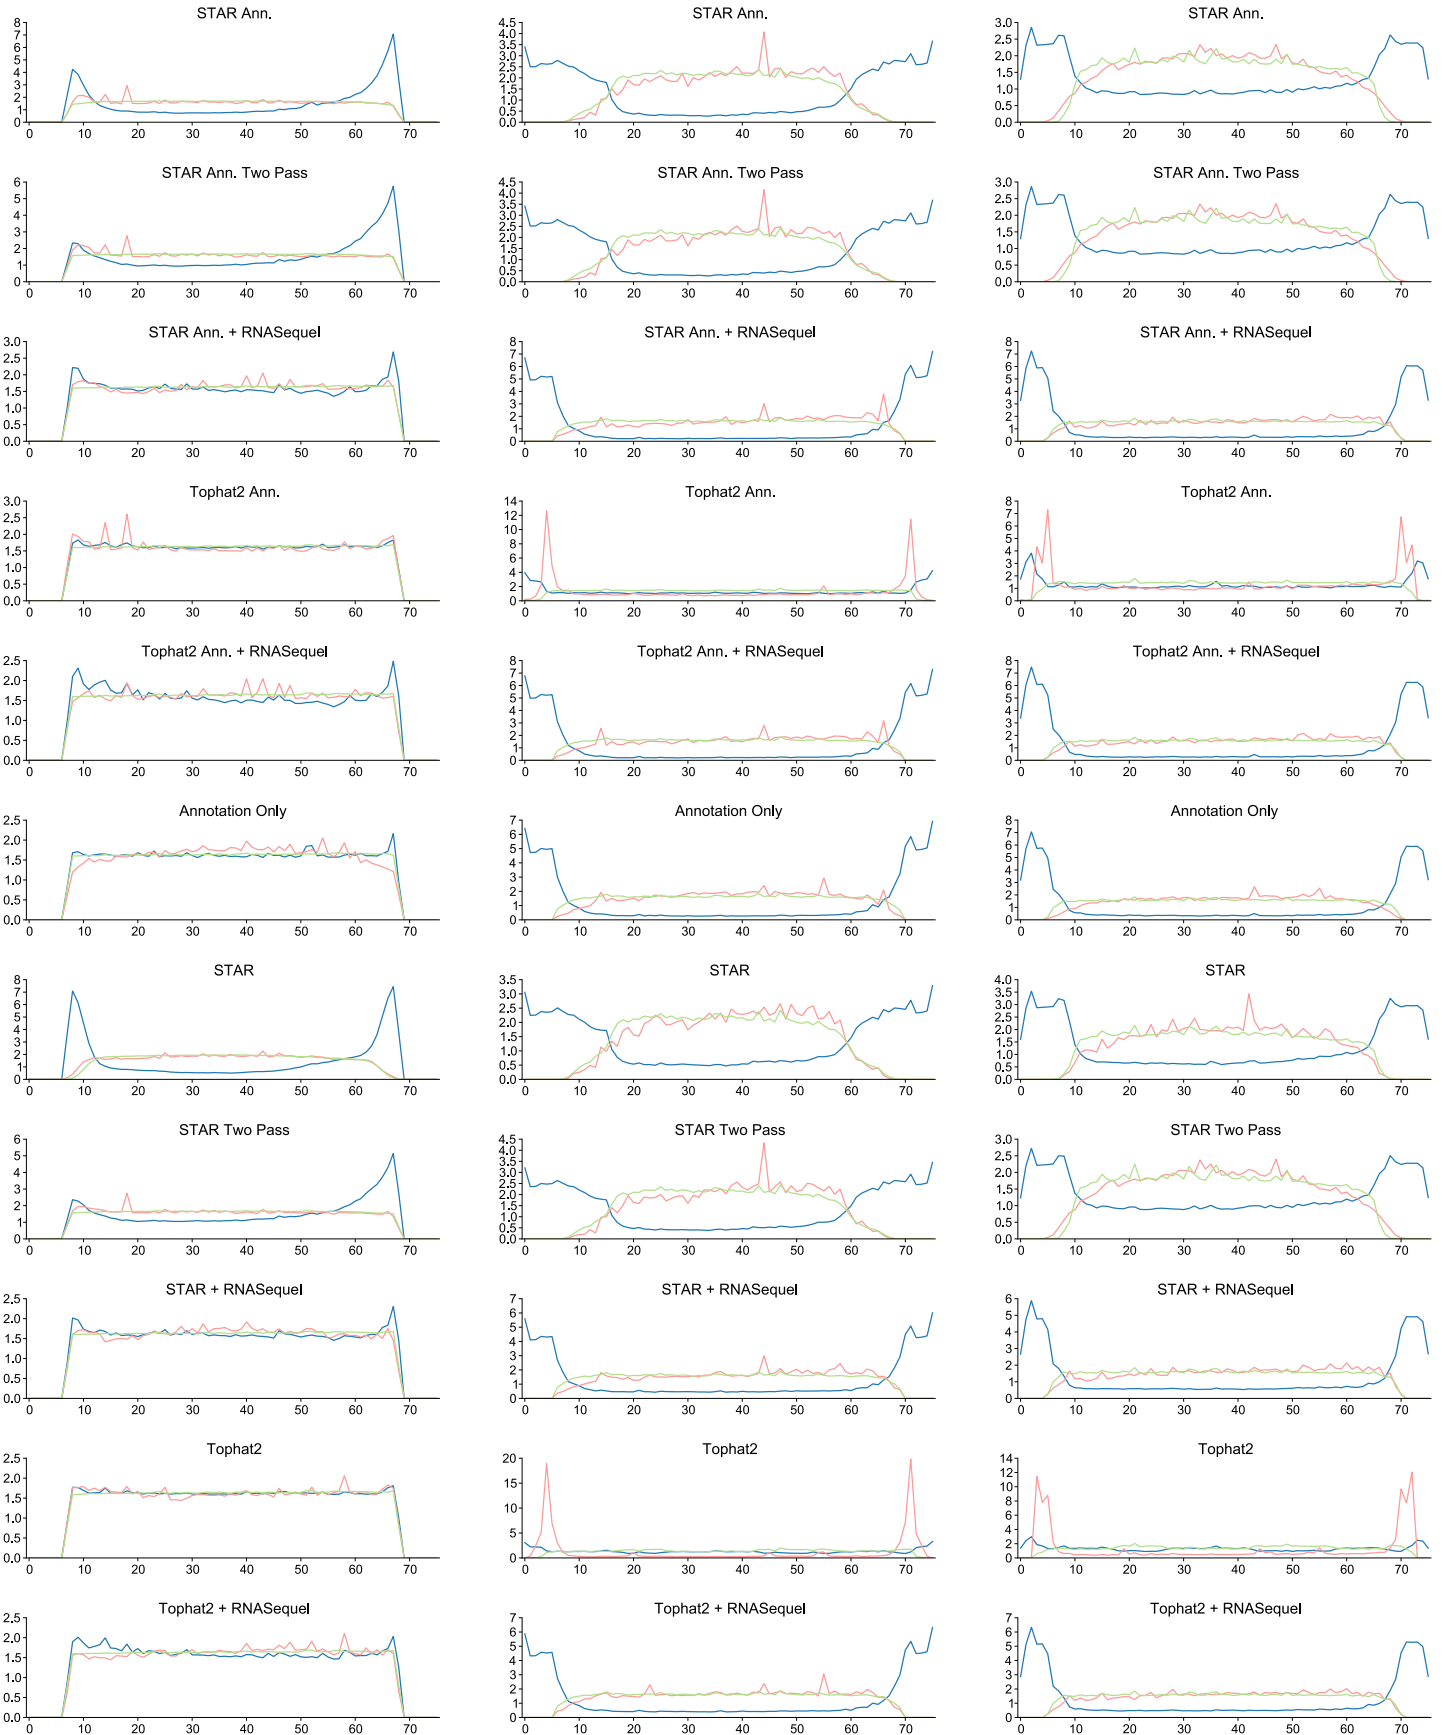



# Figure S9

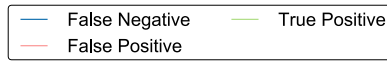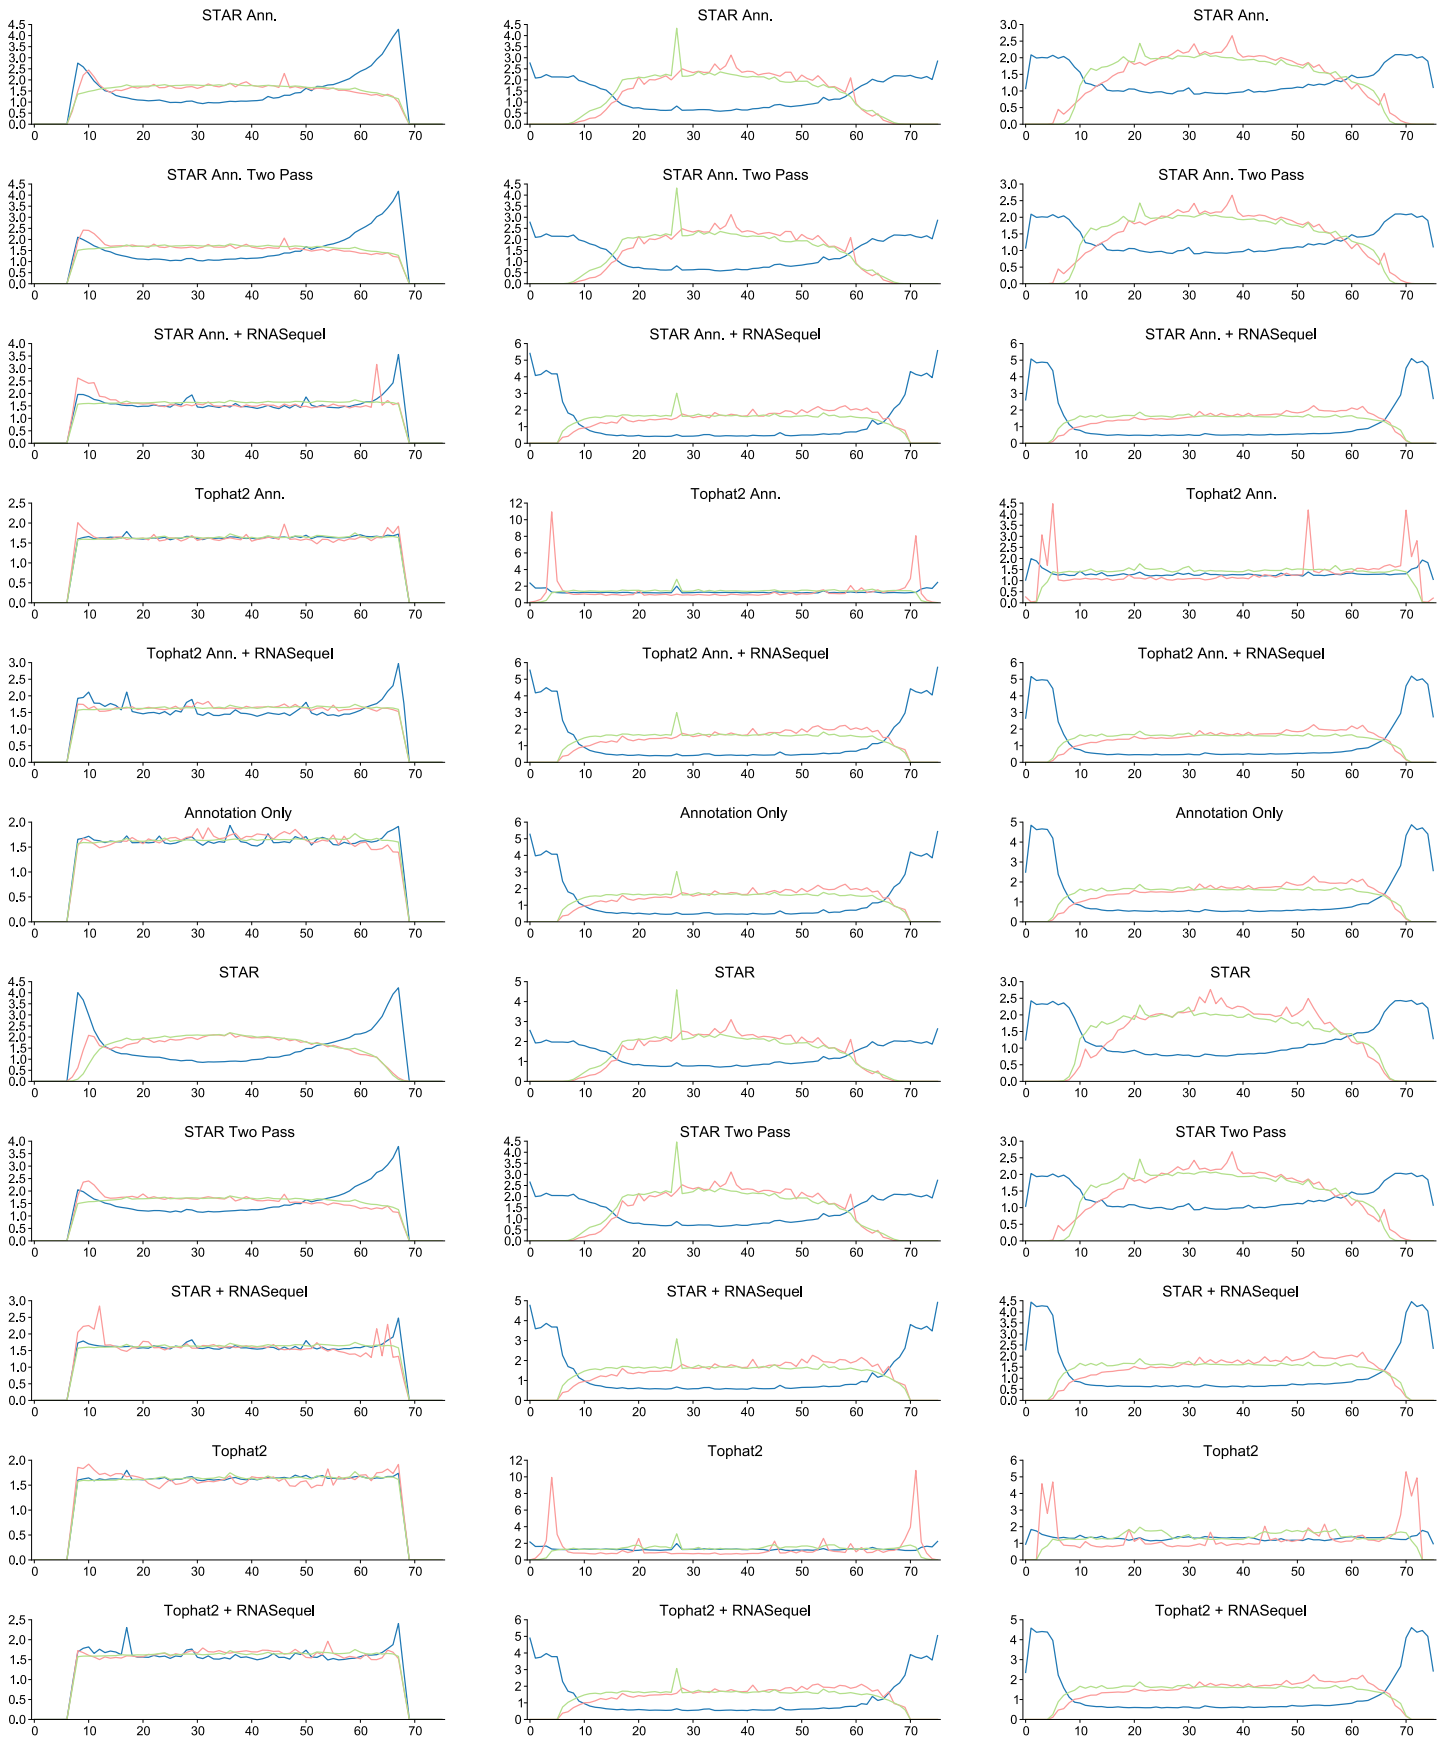

Figure S10

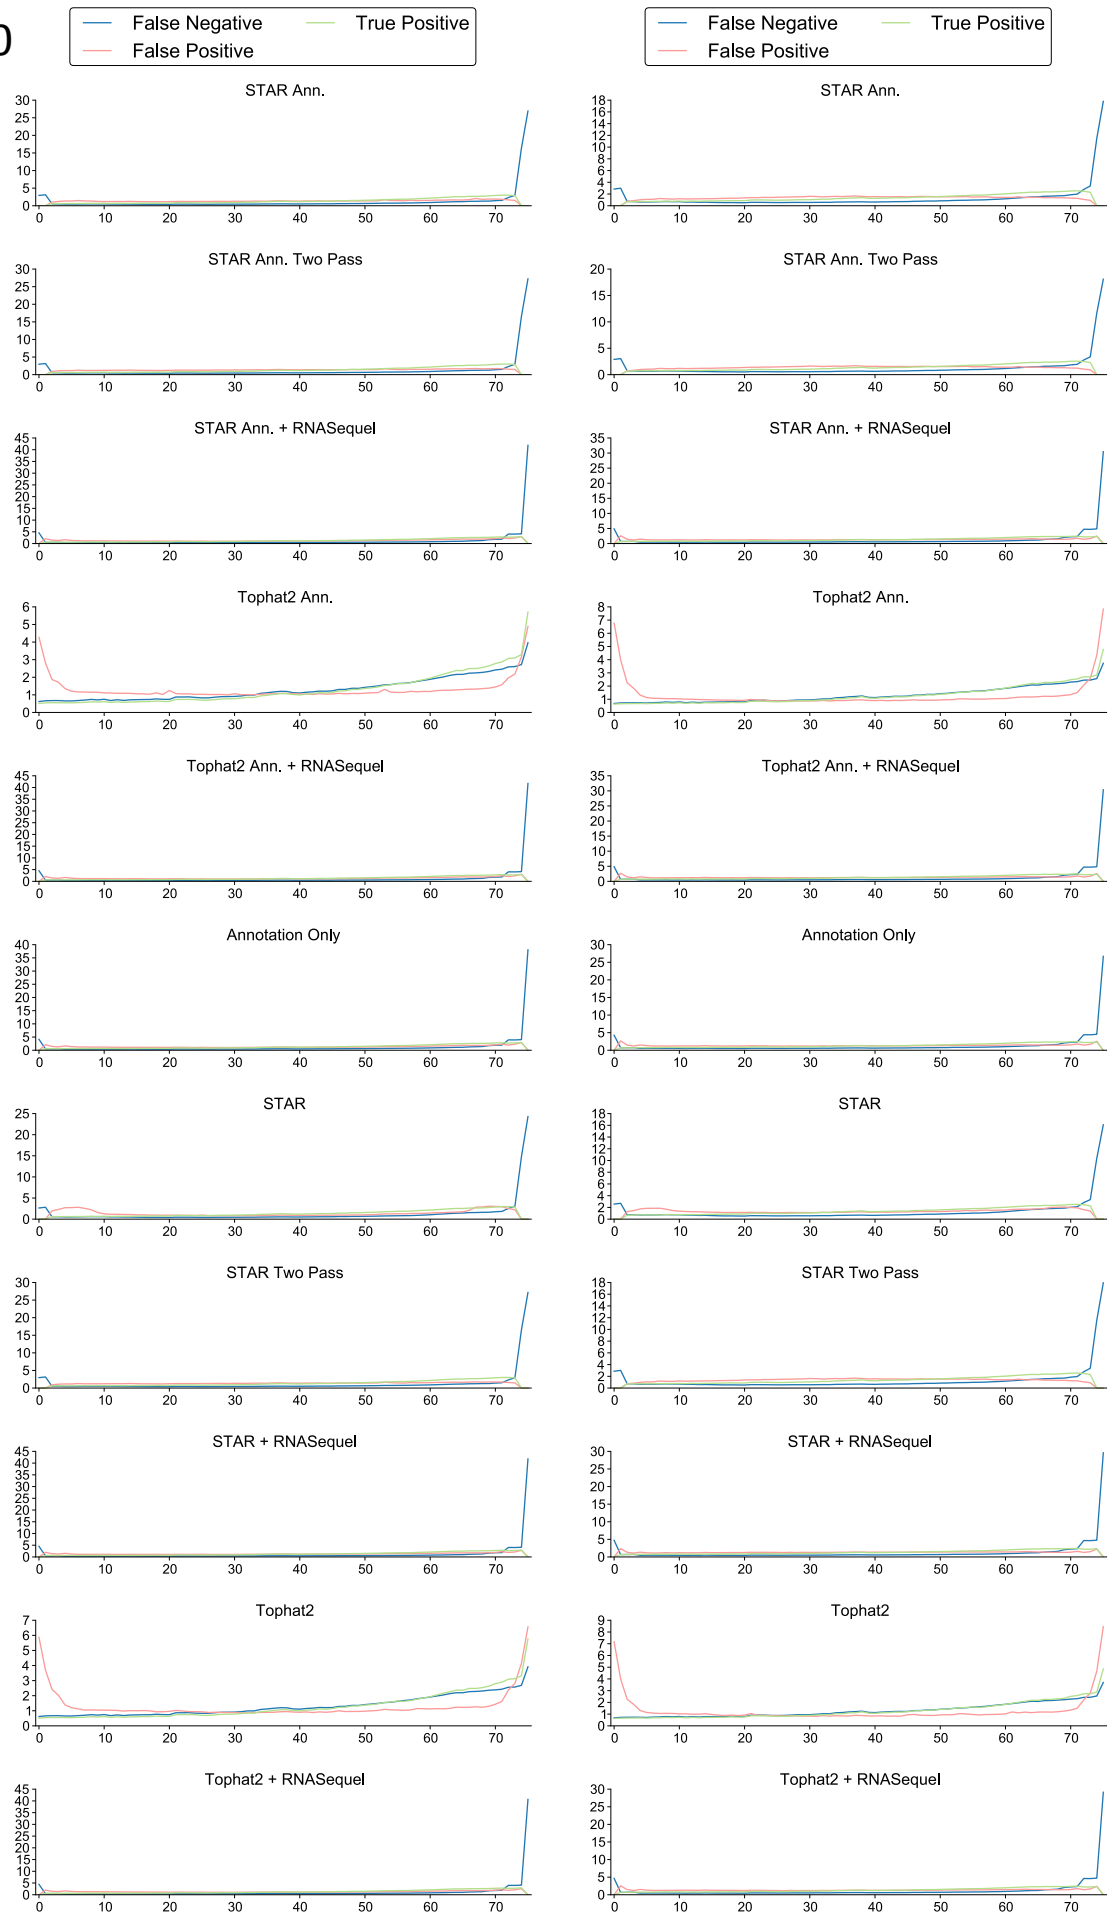

# Figure S11

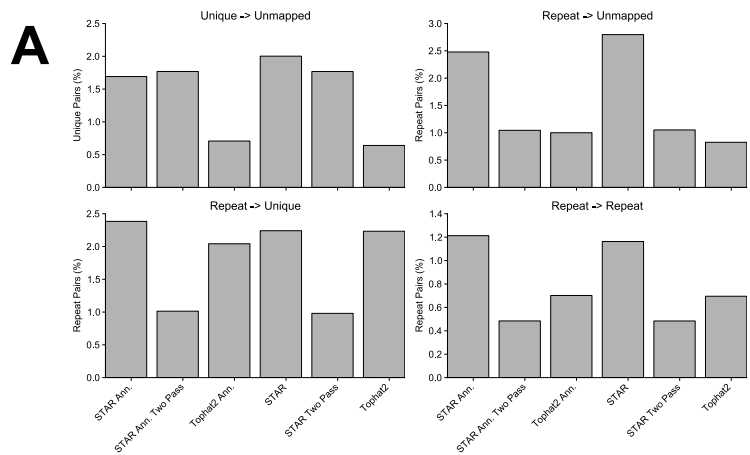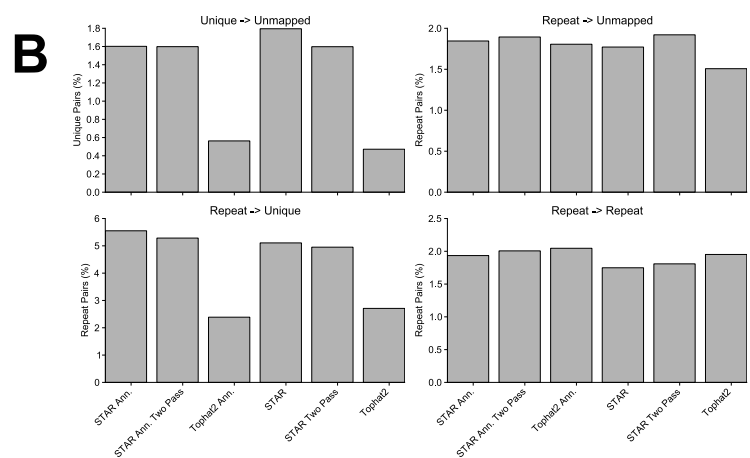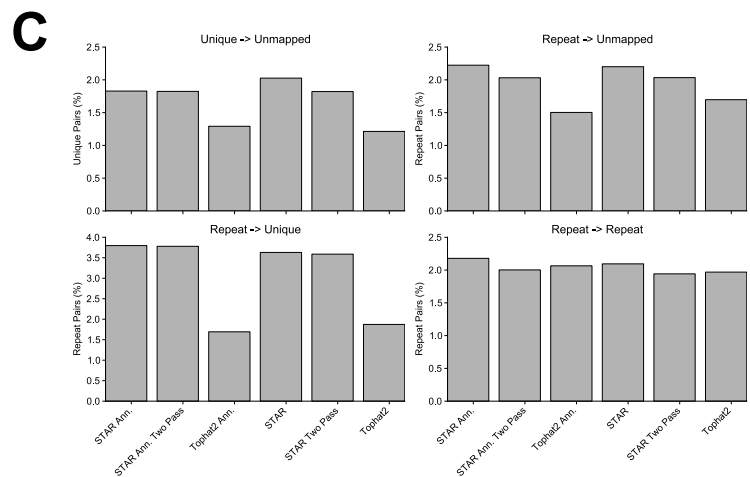

# Figure S12

## A

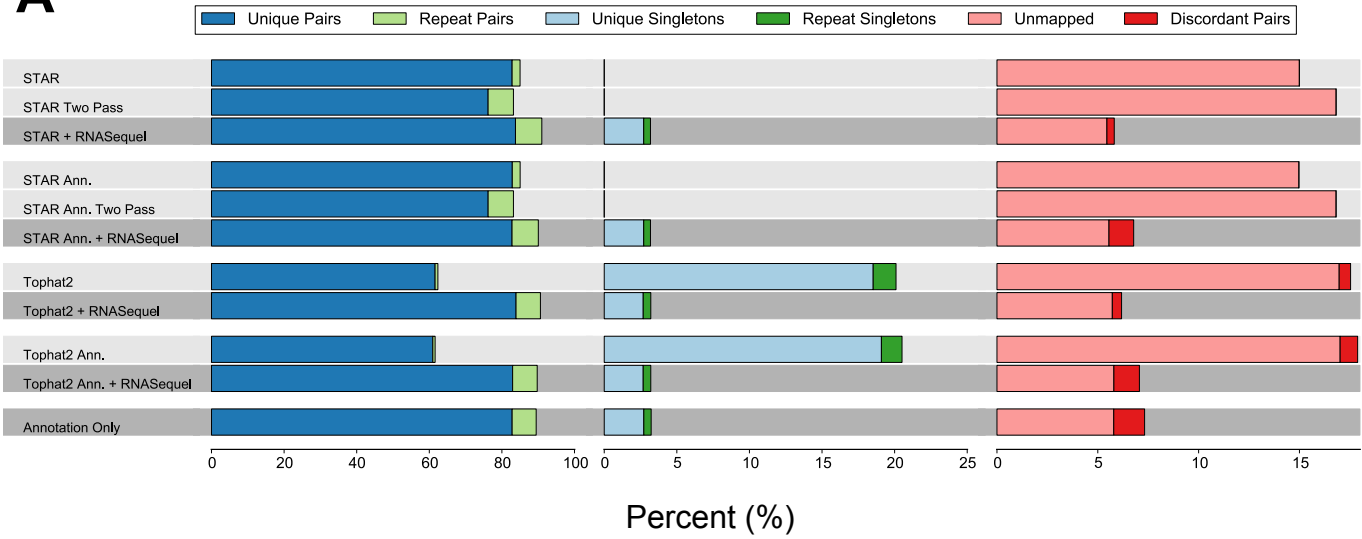

## B

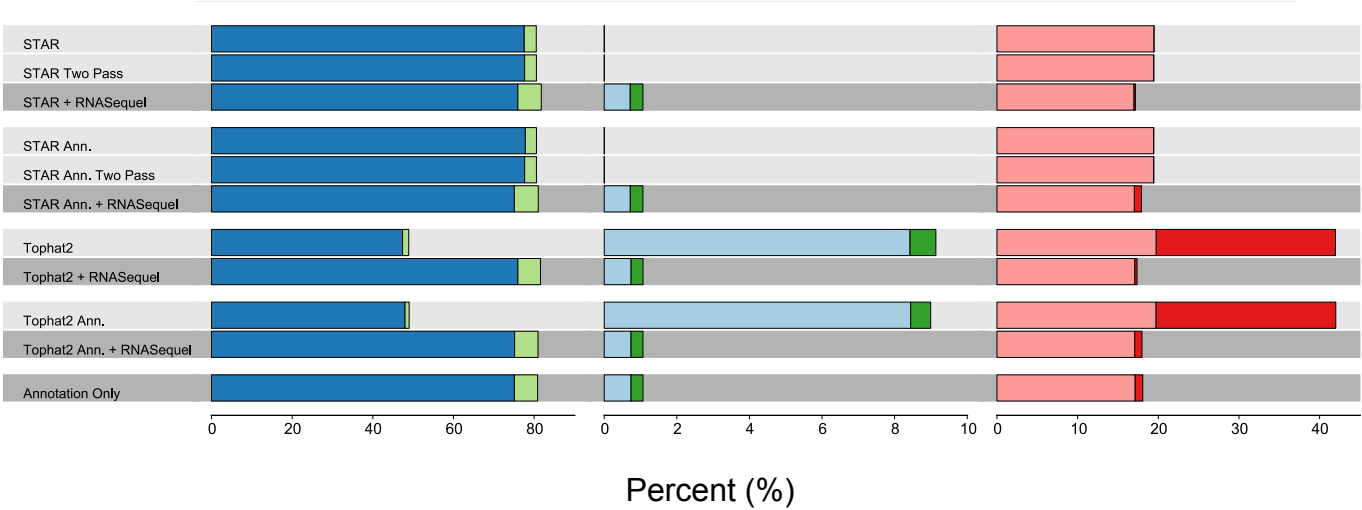

## C

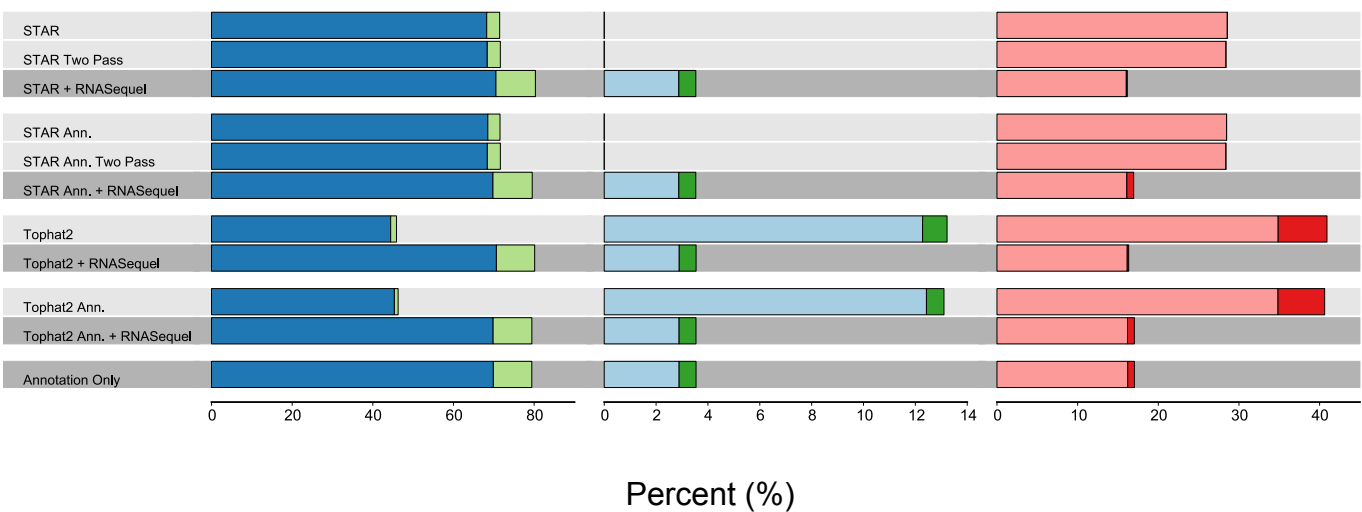

Figure S13

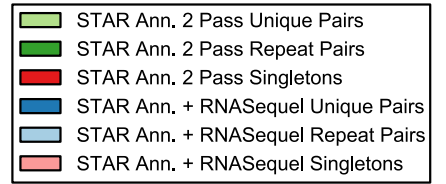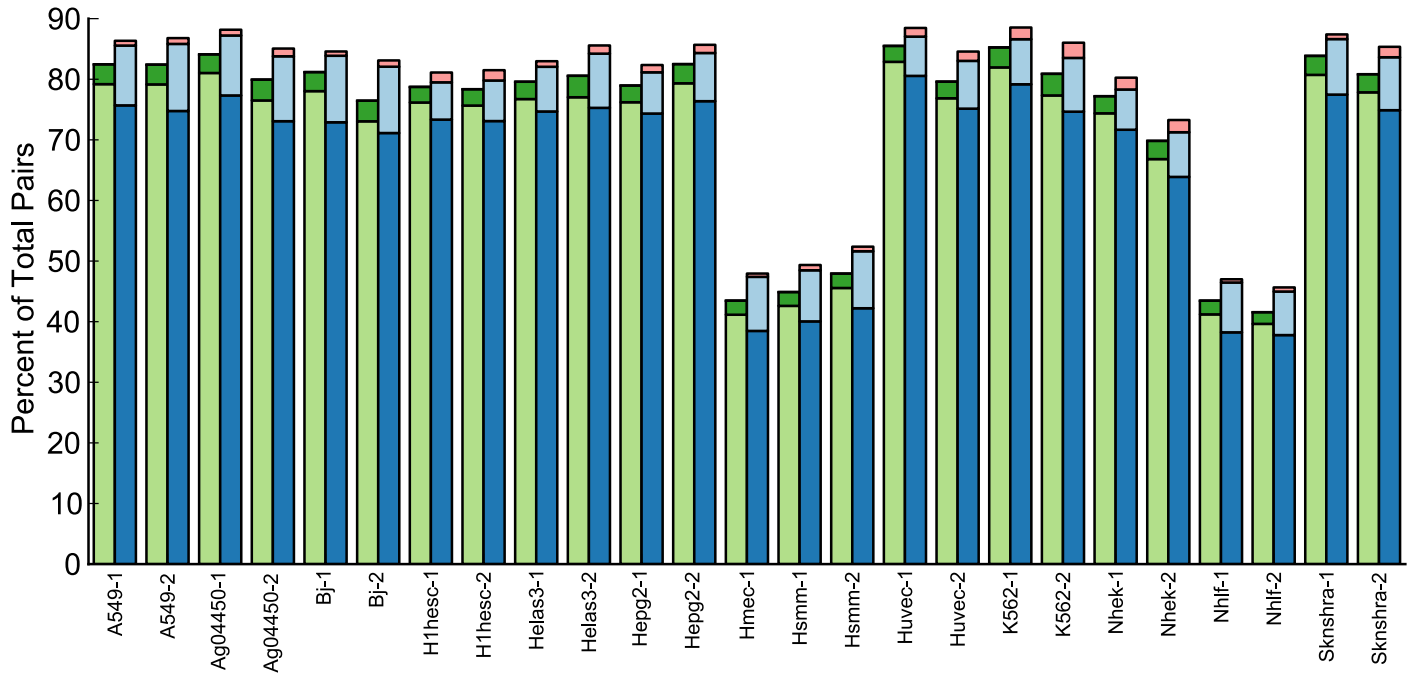

# A Figure S14

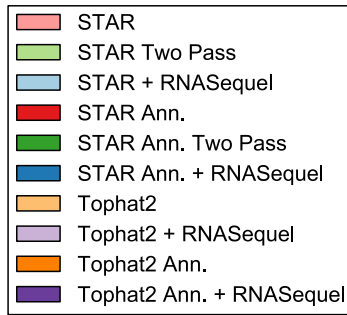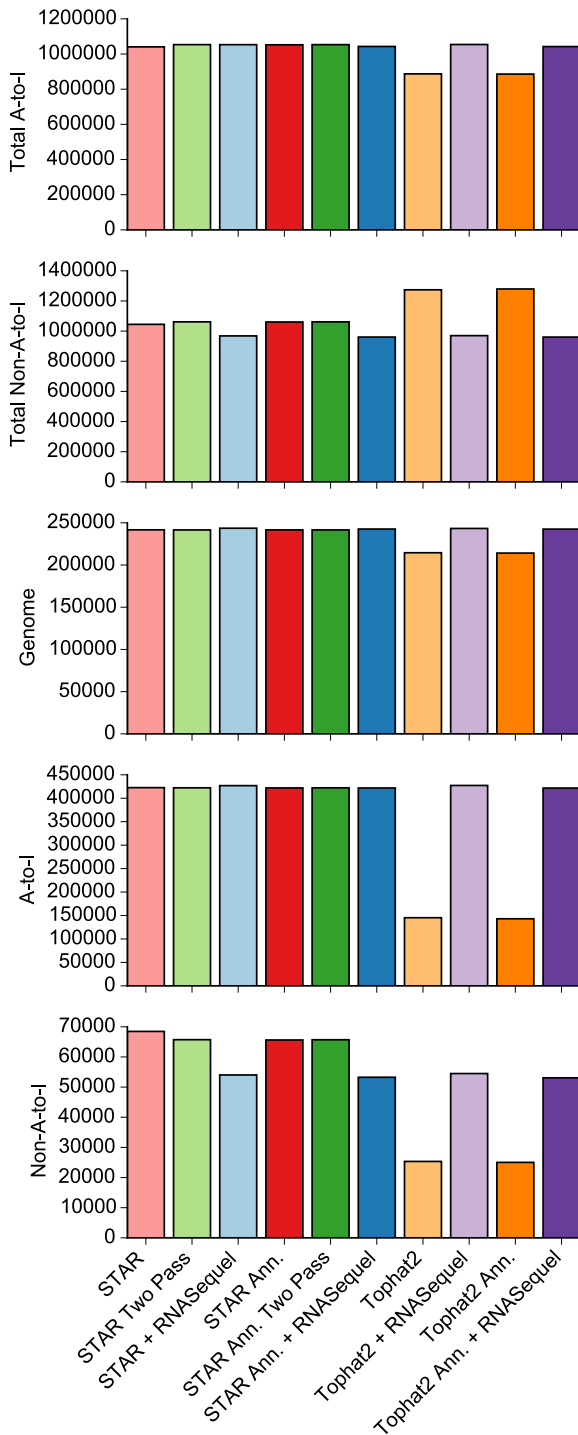

# B

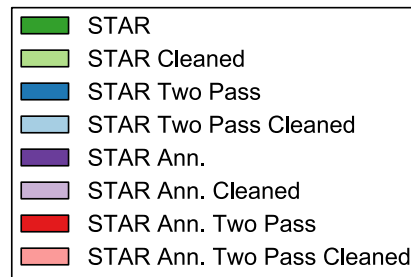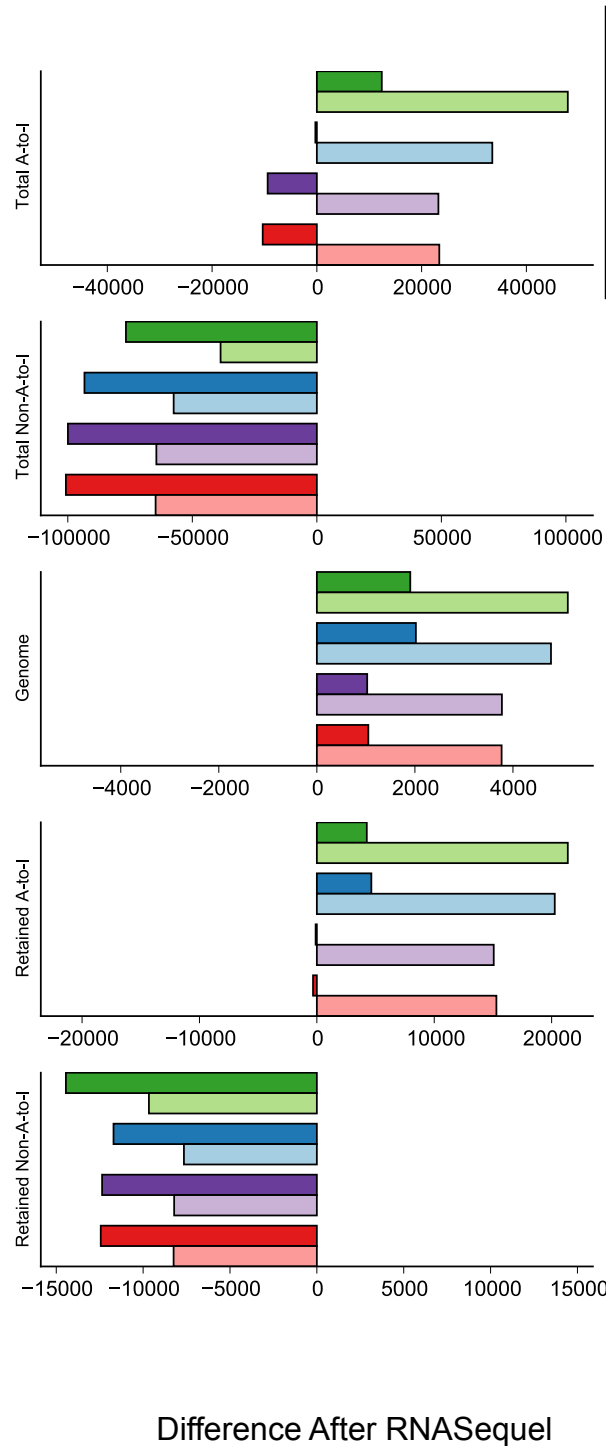

# A Figure S15

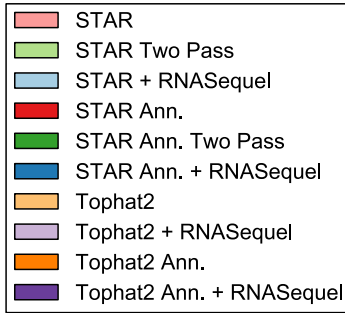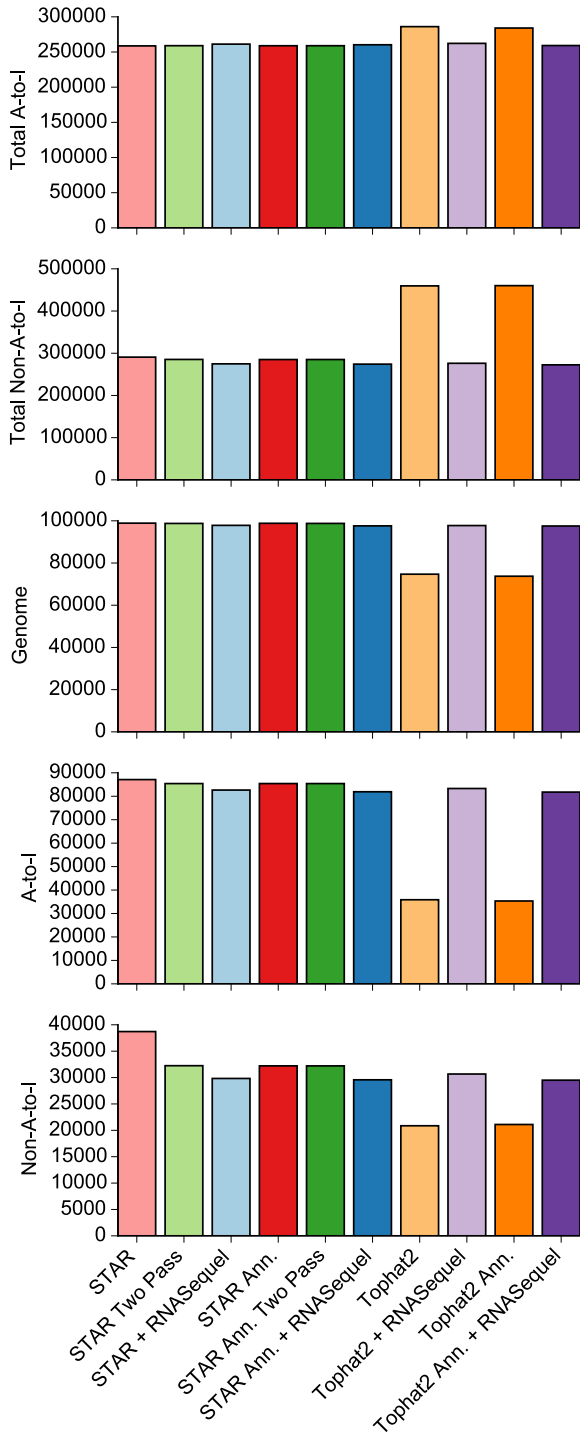

# B

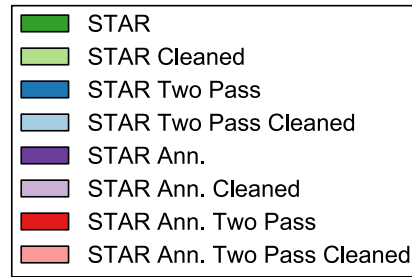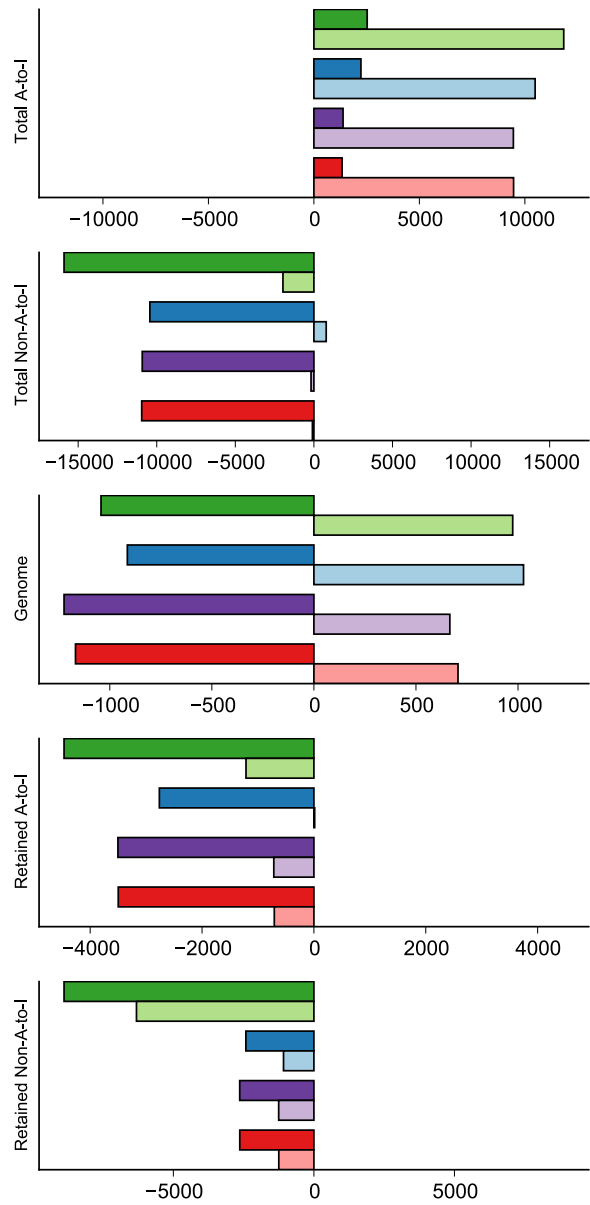

Difference After RNASequel

# A Figure S16

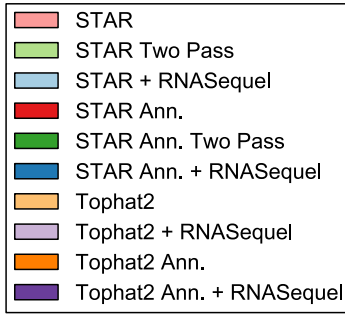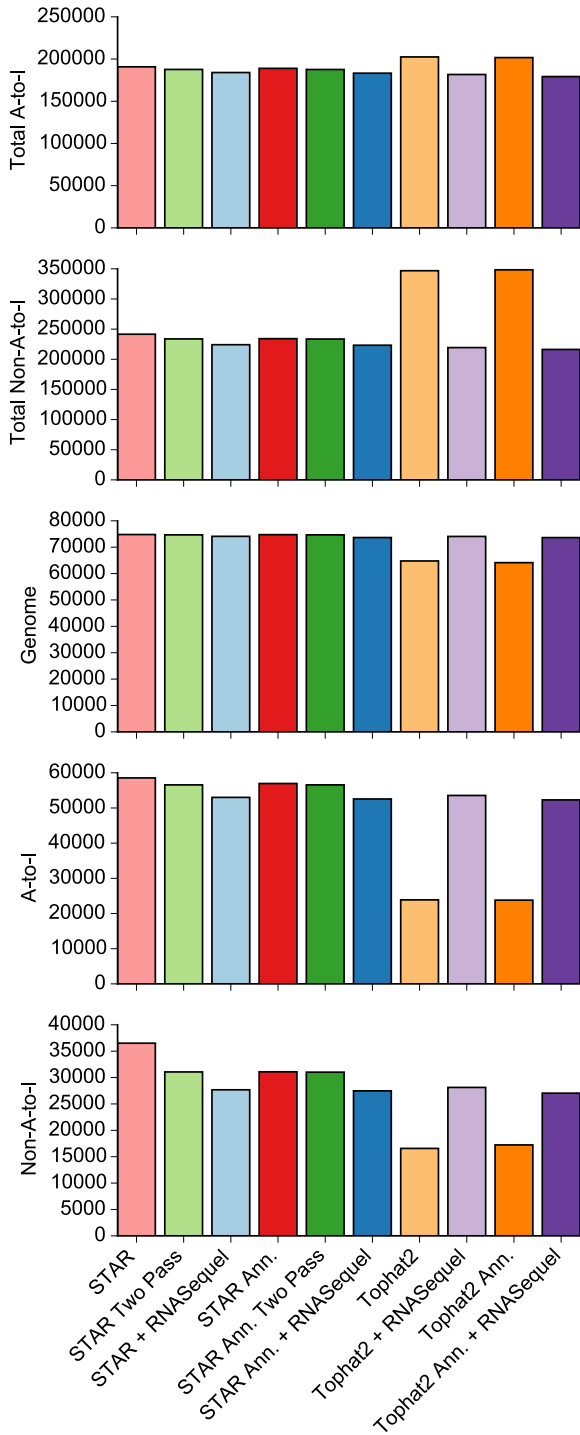

# B

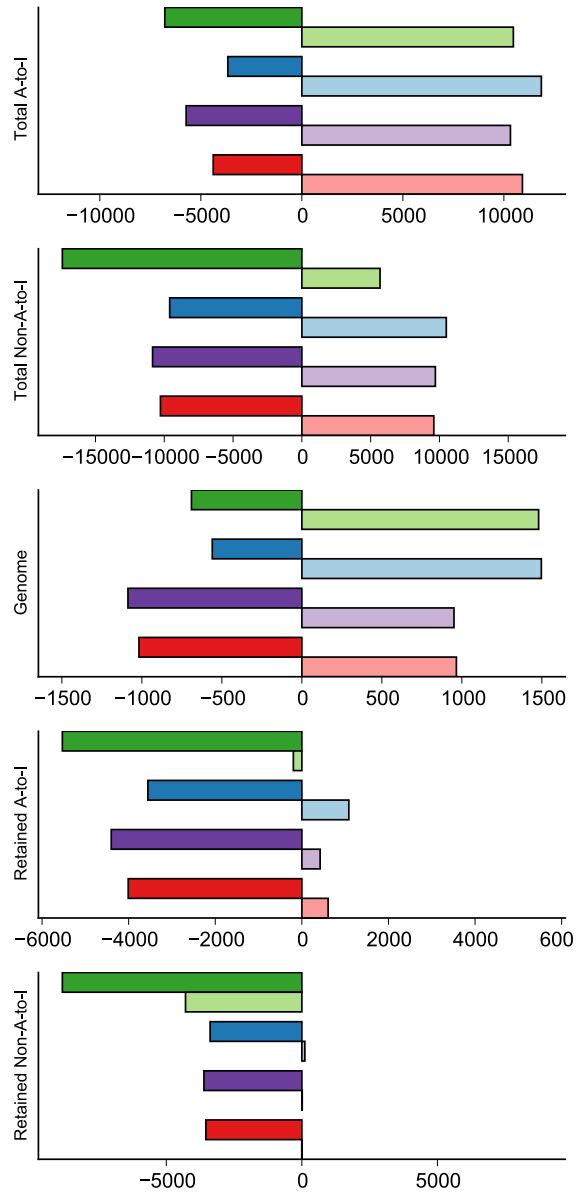

Difference After RNASequel



Figure S17

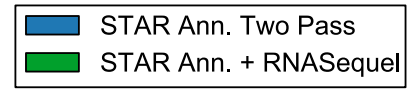

**A**

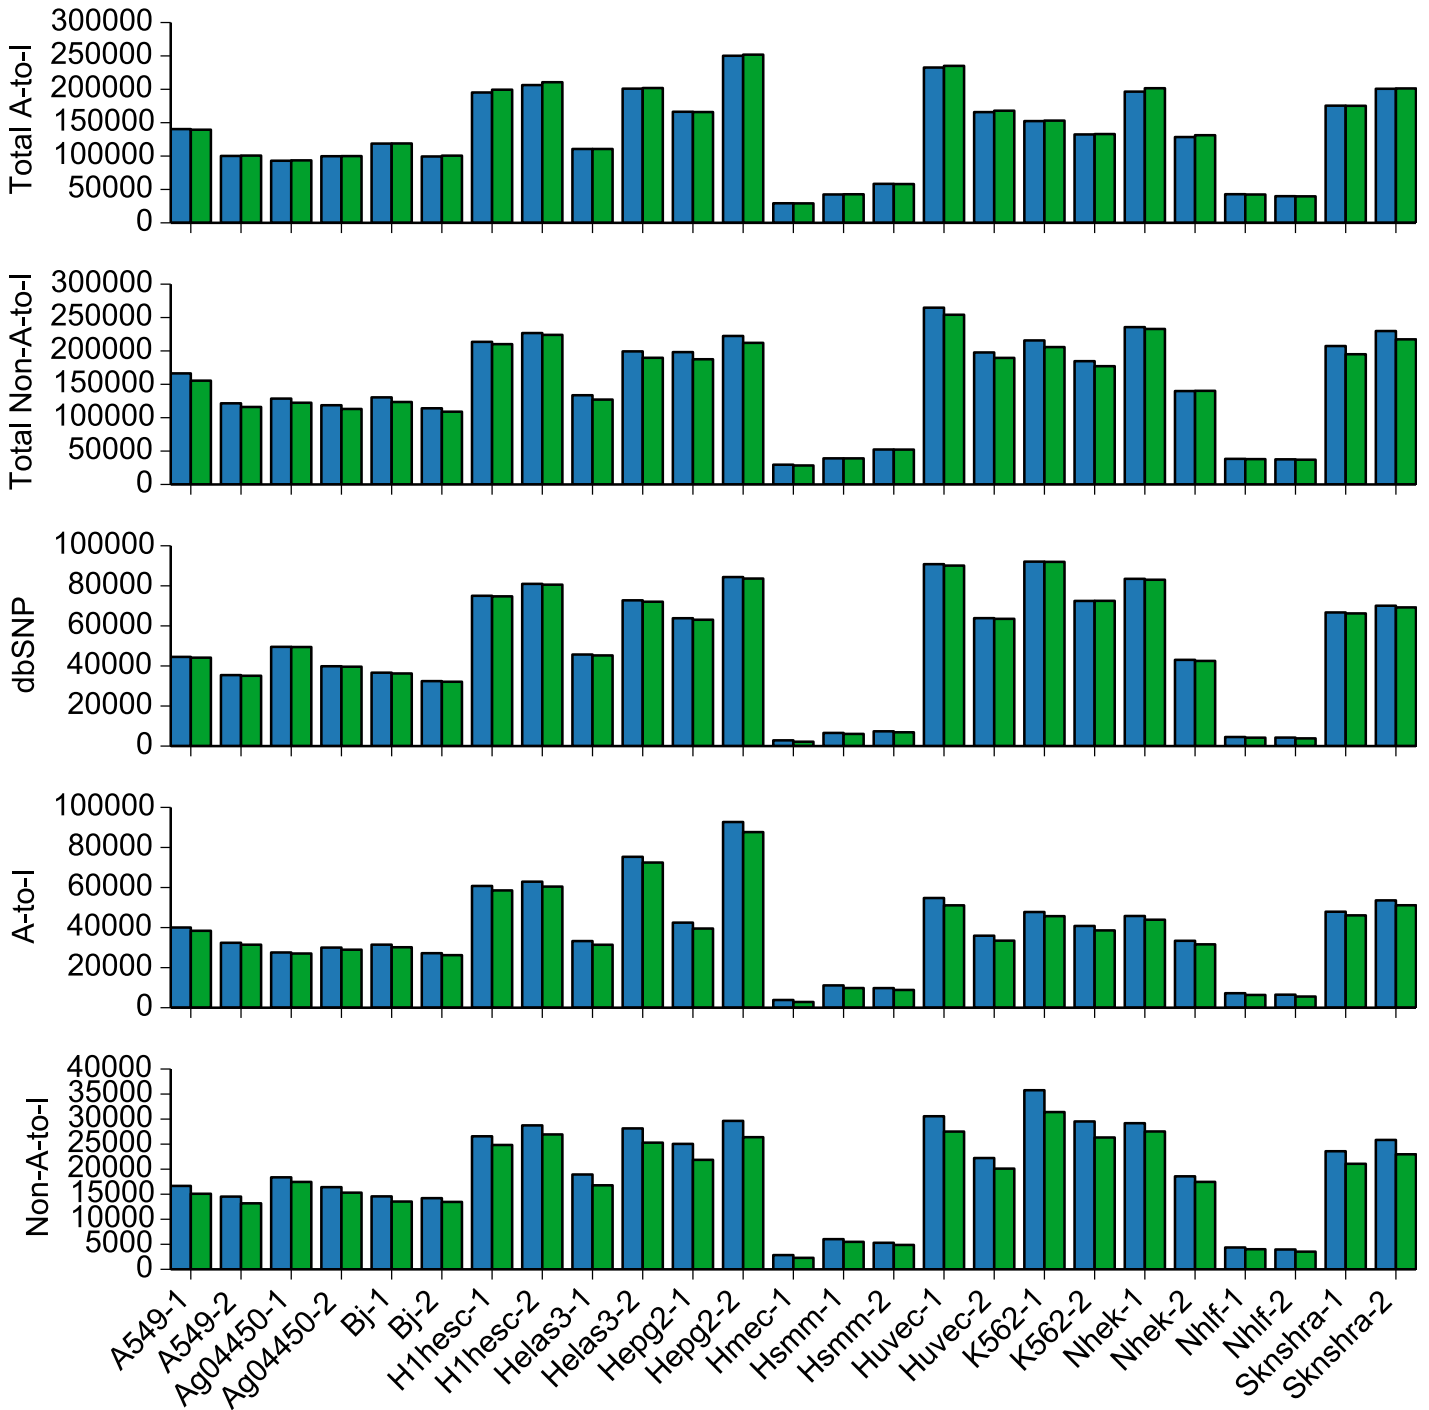

Figure S18

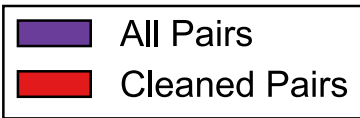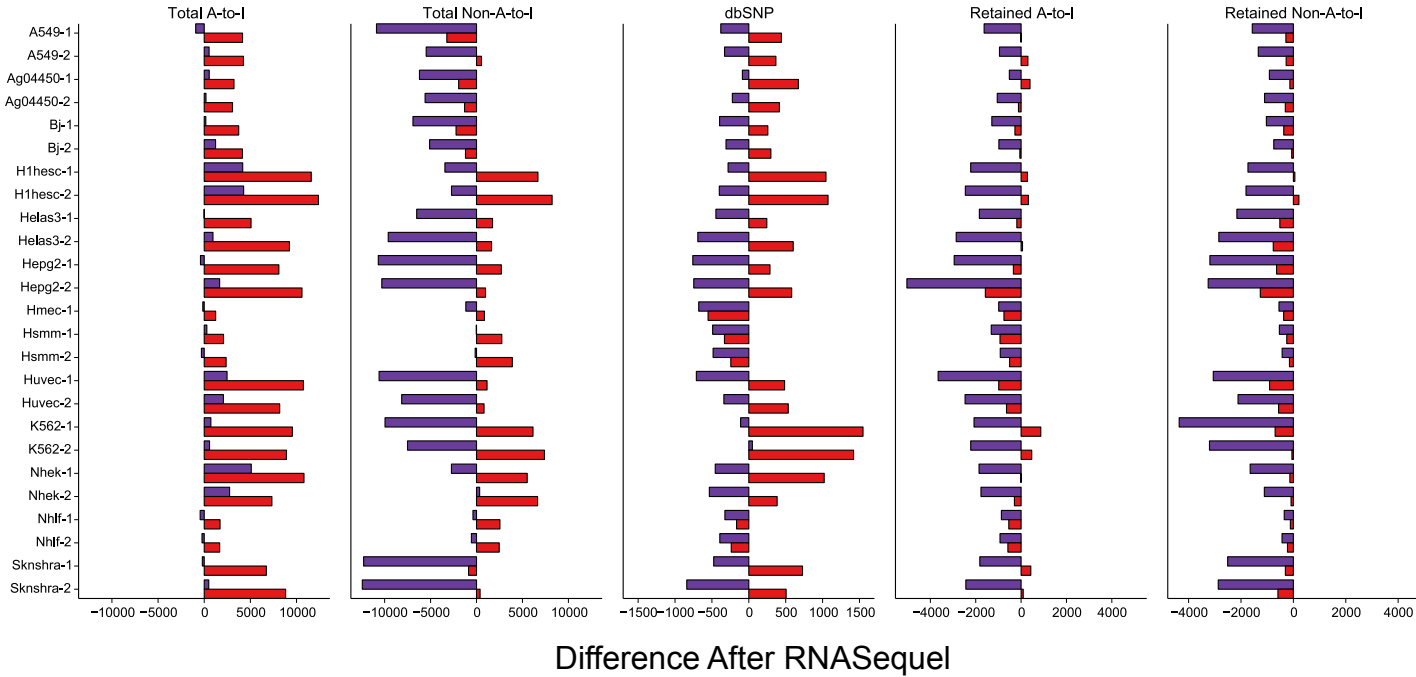

Figure S19

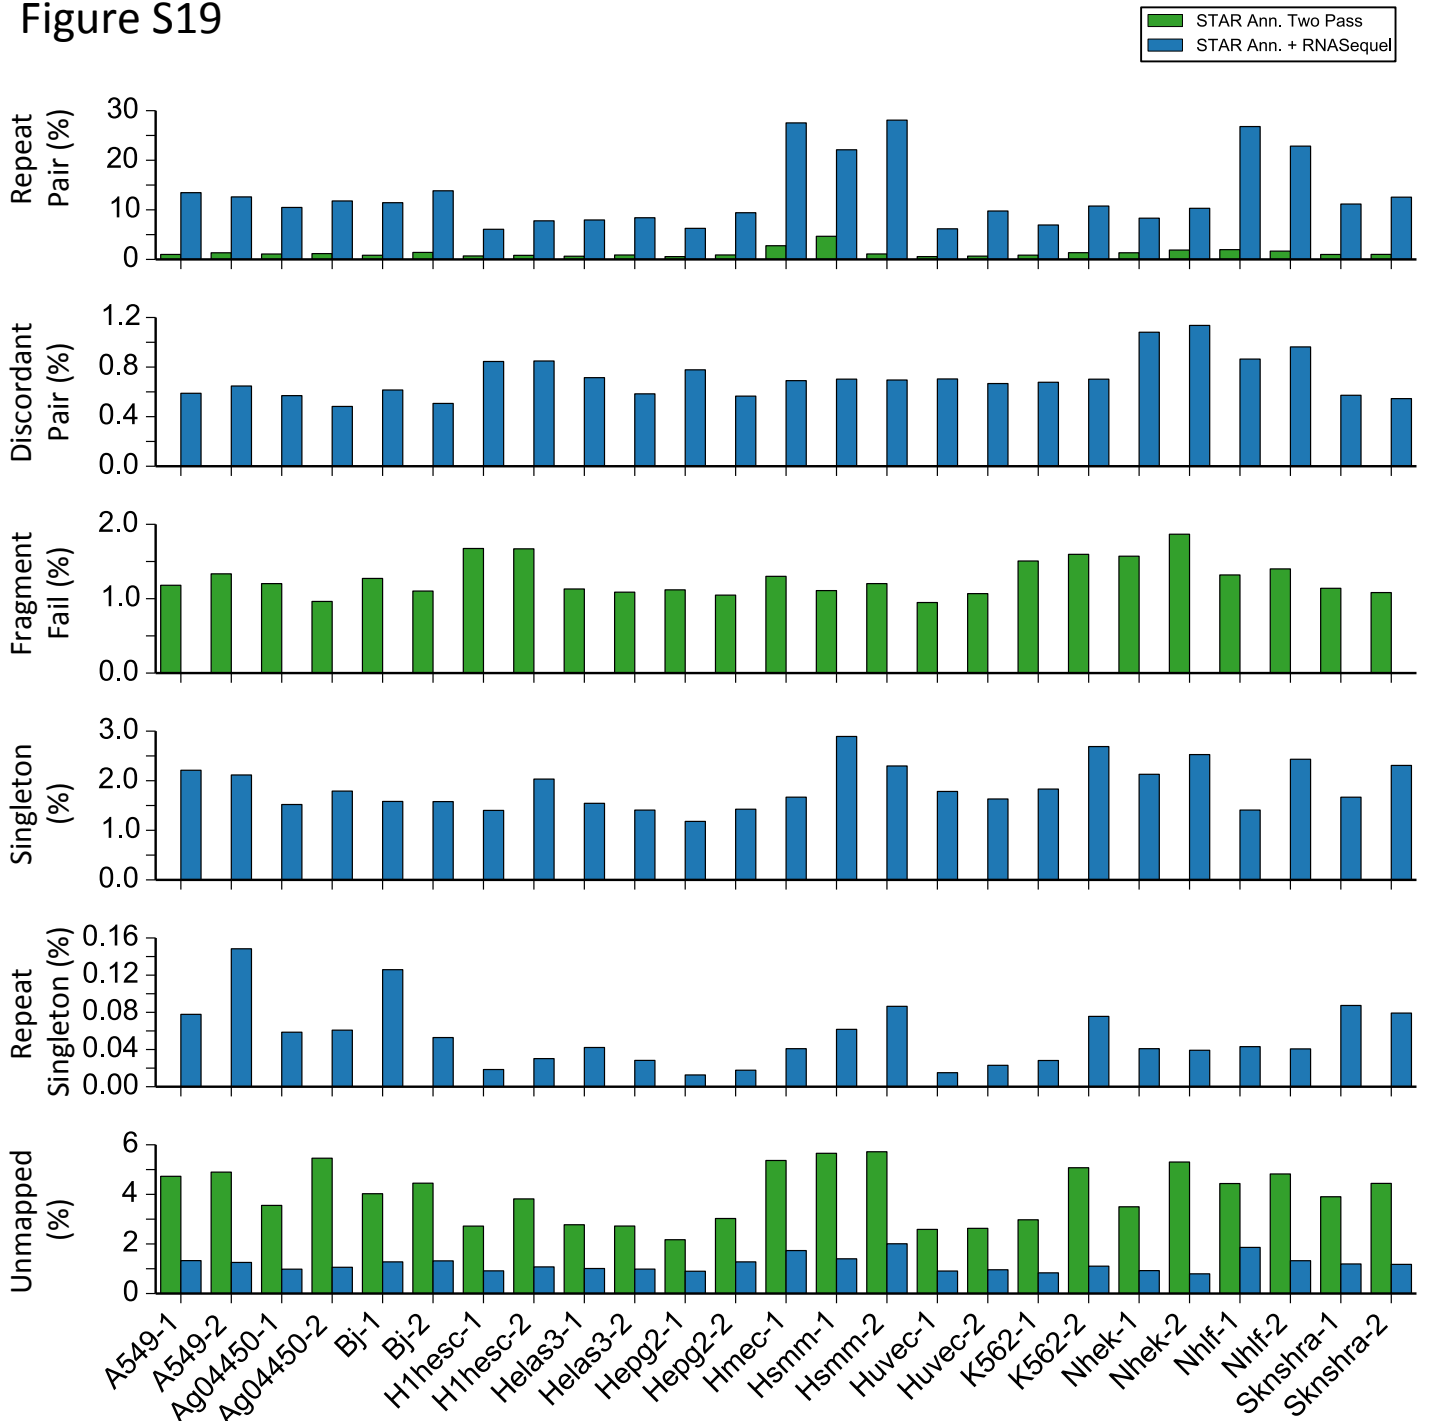

Supplement: supp_gkv594_nar-00649-met-g-2015-File007.pdf [file supp_gkv594_nar-00649-met-g-2015-File007.pdf]
